# Supplementary material
Source: PubMed Central journal article supplement (PMC2655618)
Supplement: supp_29_7_1895__1.pdf [file supp_29_7_1895__1.pdf]

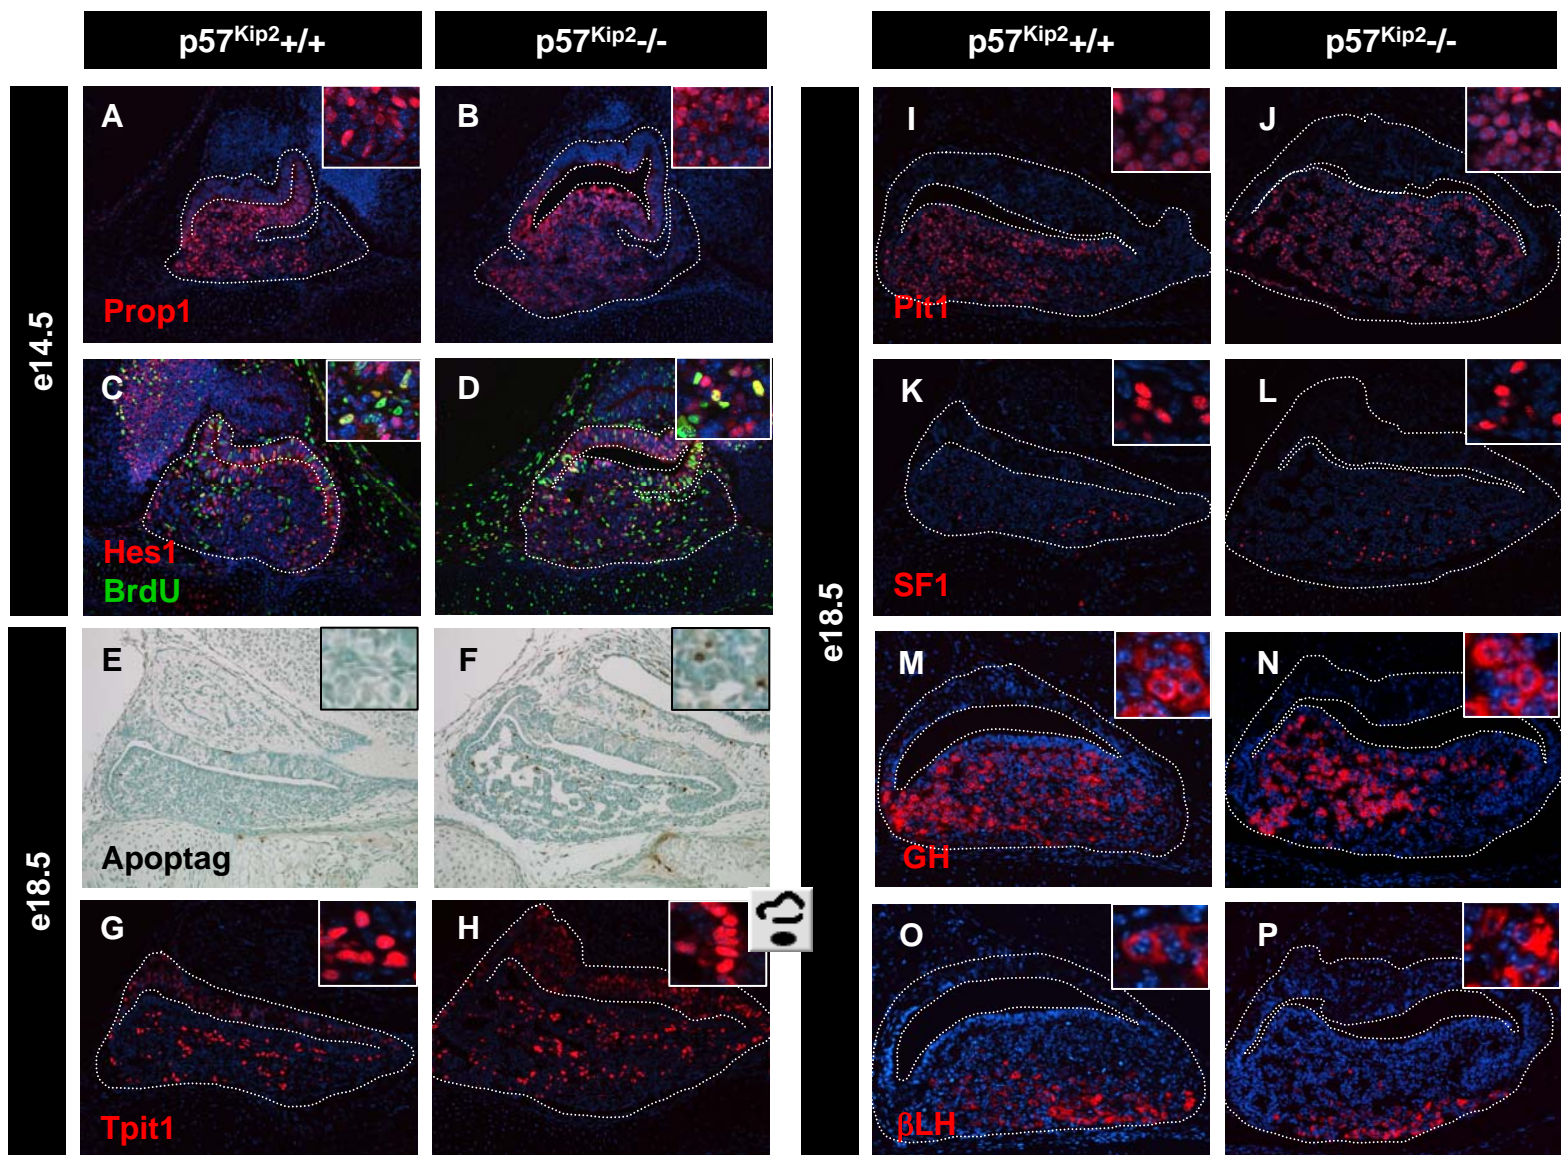

**Suppl. Figure 1. Bilodeau et al.**

**Further Characterization of p57Kip2<sup>-/-</sup> pituitaries.** A, B) Expression of *Prophet-of-Pit1* (Prop-1) is unaffected in p57Kip2<sup>-/-</sup> pituitaries. C, D) Active Notch signaling in proliferating progenitors (BrdU, green) is shown by Hes1 (red) co-immunofluorescence. Hes1-positive cells increase in p57Kip2<sup>-/-</sup> pituitaries in agreement with the expansion of proliferating progenitors. E, F) TUNEL assay (ApopTag) reveals a large number of apoptotic cells in p57Kip2<sup>-/-</sup> (F) compared to normal e18.5 pituitaries (E). G-P) Note that differentiation of hormone-producing cells occur normally in knockout pituitaries as shown by expression of Tpit (G,H), Pit1 (I,J), SF1 (K,L), GH (M,N) and βLH (O,P).
